# Supplementary material for: Coexistence of spin frustration and long-range magnetic ordering in a triangular CoII3(μ3-OH)-based two-dimensional compound
Source: Royal Society of Chemistry journal article supplement (doi:10.1039/b511612k), 2005-11-18
Supplement: b511612k.pdf [file b511612k.pdf]

*ELECTRONIC SUPPLEMENTARY DATA*

for

**Coexistence of Spin Frustration and Long-Range Magnetic  
Ordering in A Triangular  $\text{Co}^{\text{II}}_3(\mu_3\text{-OH})$ -based Two-Dimensional  
Compound**

Yan-Zhen Zheng, Ming-Liang Tong, Wei-Xiong Zhang, and Xiao-Ming Chen\*

State Key Laboratory of Optoelectronic Materials and Technologies,

School of Chemistry and Chemical Engineering,

Sun Yat-Sen University,

Guangzhou 510275,

China

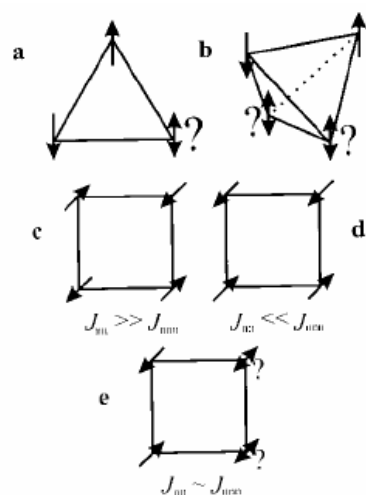

**Scheme 1S** Frustrated “plaquettes”: (a) the equilateral triangle, (b) the tetrahedron, (c) the square plane with  $J_{nn} \gg J_{nnn}$ , (d) square plane with  $J_{nn} \ll J_{nnn}$ , (e) square plane with  $J_{nn} \sim J_{nnn}$ .

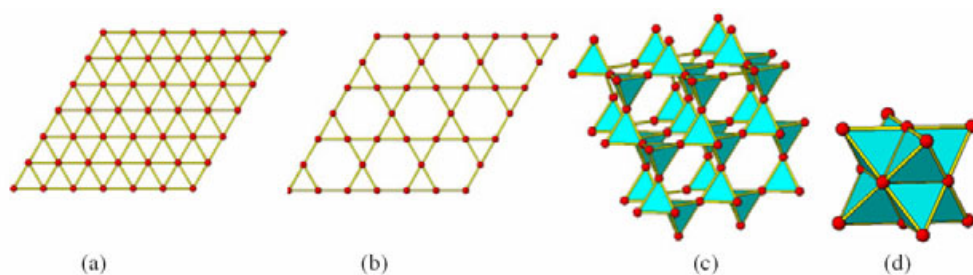

**Scheme 2S** Geometrically frustrated lattices of antiferromagnetic bonds: (a) triangular, (b) Kagomé, (c) pyrochlore and (d) fcc lattices.<sup>3c</sup>

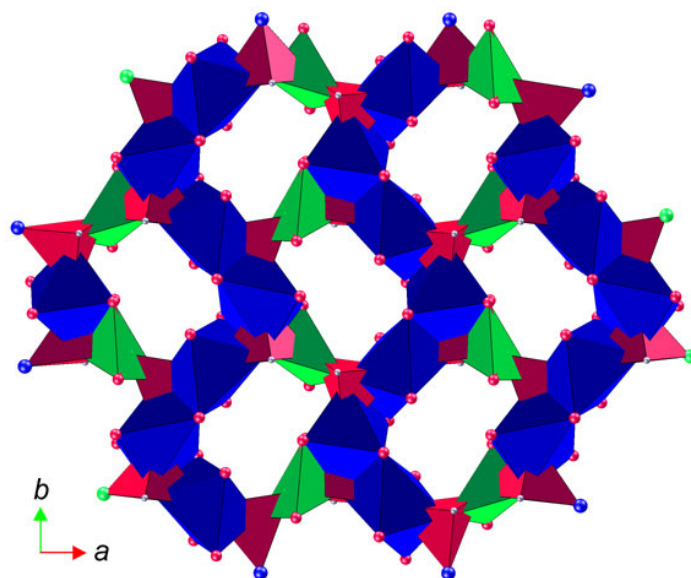

**Fig. S1** The 2D  $[\text{Co}_3(\text{OH})_2]^{4+}_\infty$  layer (oxygen atoms of  $\mu_3\text{-OH}$ , octahedral cobalt(II) atoms and tetrahedral cobalt(II) atoms are highlighted in red, blue and green polyhedra

respectively, and the carbon atoms are omitted for clarity) in **1**.

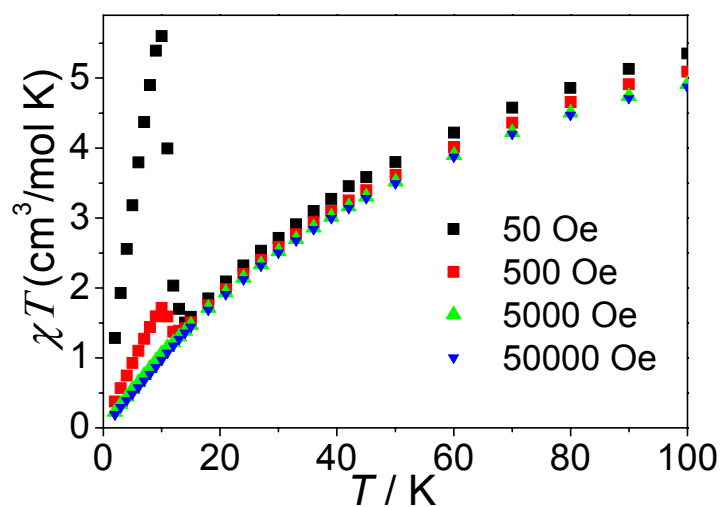

**Fig. S2**  $\chi T$  vs.  $T$  plot at various fields in **1**.

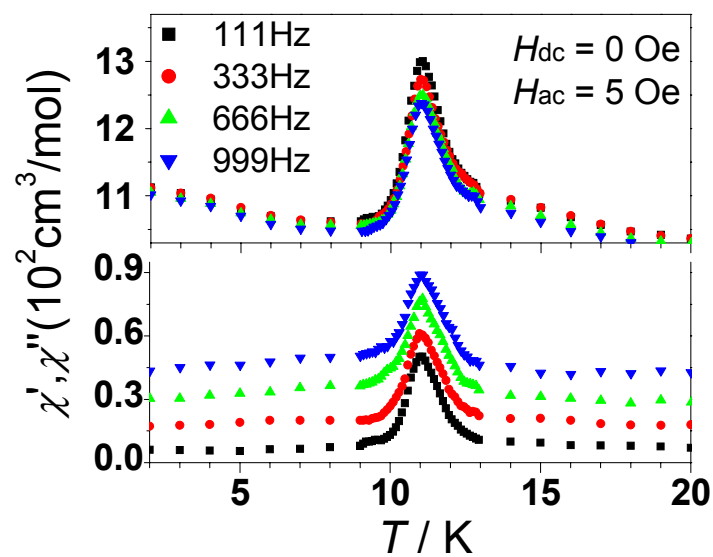

**Fig. S3** Temperature dependence of ac susceptibility at various frequencies from from 2-20 K.

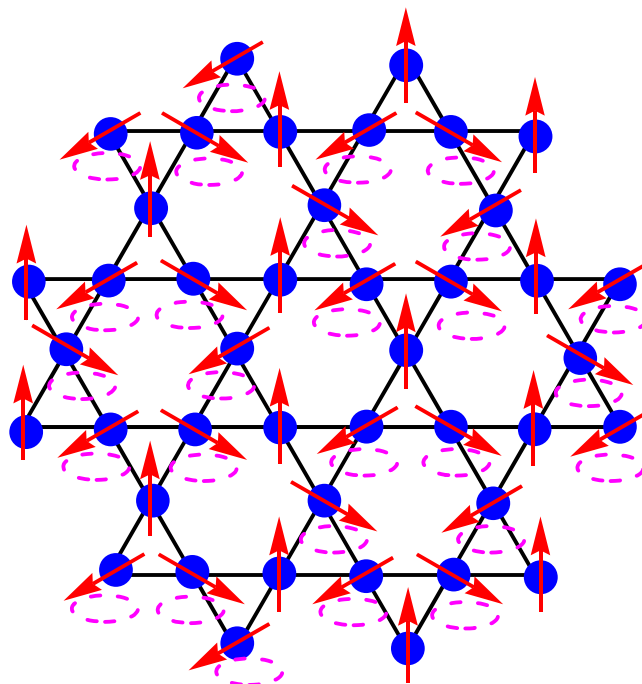

**Scheme 3S.** One possible ground-state configuration in Kagomé lattice, where the spins on a hexagon can be rotated out of the plane about the dotted ellipse without changing the energy, generating an infinite number of degenerate ground states.<sup>6</sup>

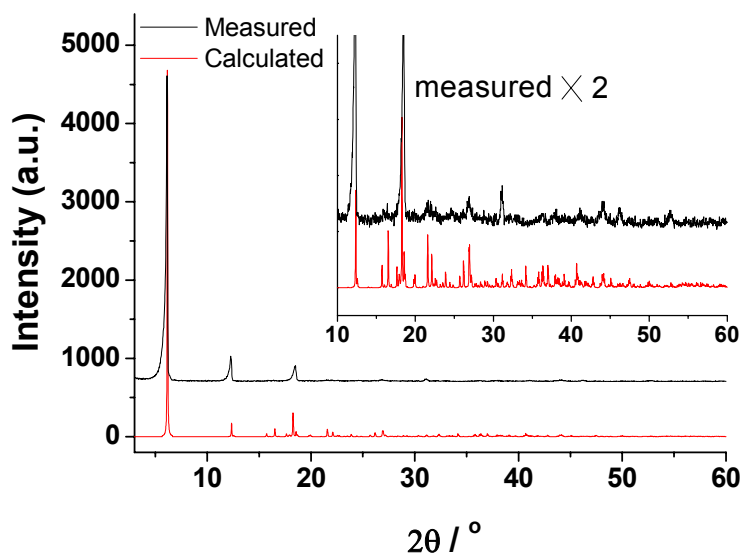

**Fig. S4** Measured and calculated X-ray powder diffraction (XRD) pattern of **1** (inset: twice enlarged plot from 10 to 60°).
